# Supplementary material for: Performance of a prognostic 31-gene expression profile in an independent cohort of 523 cutaneous melanoma patients
Source: PubMed Central journal article supplement (PMC5800282; doi:10.1186/s12885-018-4016-3), 2018-02-05

**eFigure 1. Survival outcomes for stage IIIA and stage IIIB and C patients with molecular classification by the 31-gene expression profile test.** A) Recurrence-free survival, B) distant metastasis-free survival, and C) melanoma-specific survival for Class 1 and 2 subjects with stage IIIA disease (n=69) from the 523-sample cohort. D) Recurrence-free survival, E) distant metastasis-free survival, and F) melanoma-specific survival for Class 1 and 2 subjects with stage IIIB and IIIC disease (n=92) from the 523-sample cohort. Tables below graphs provide five-year survival rates with 95% confidence intervals and number of events. Class 1 shown in blue, Class 2 shown in red.

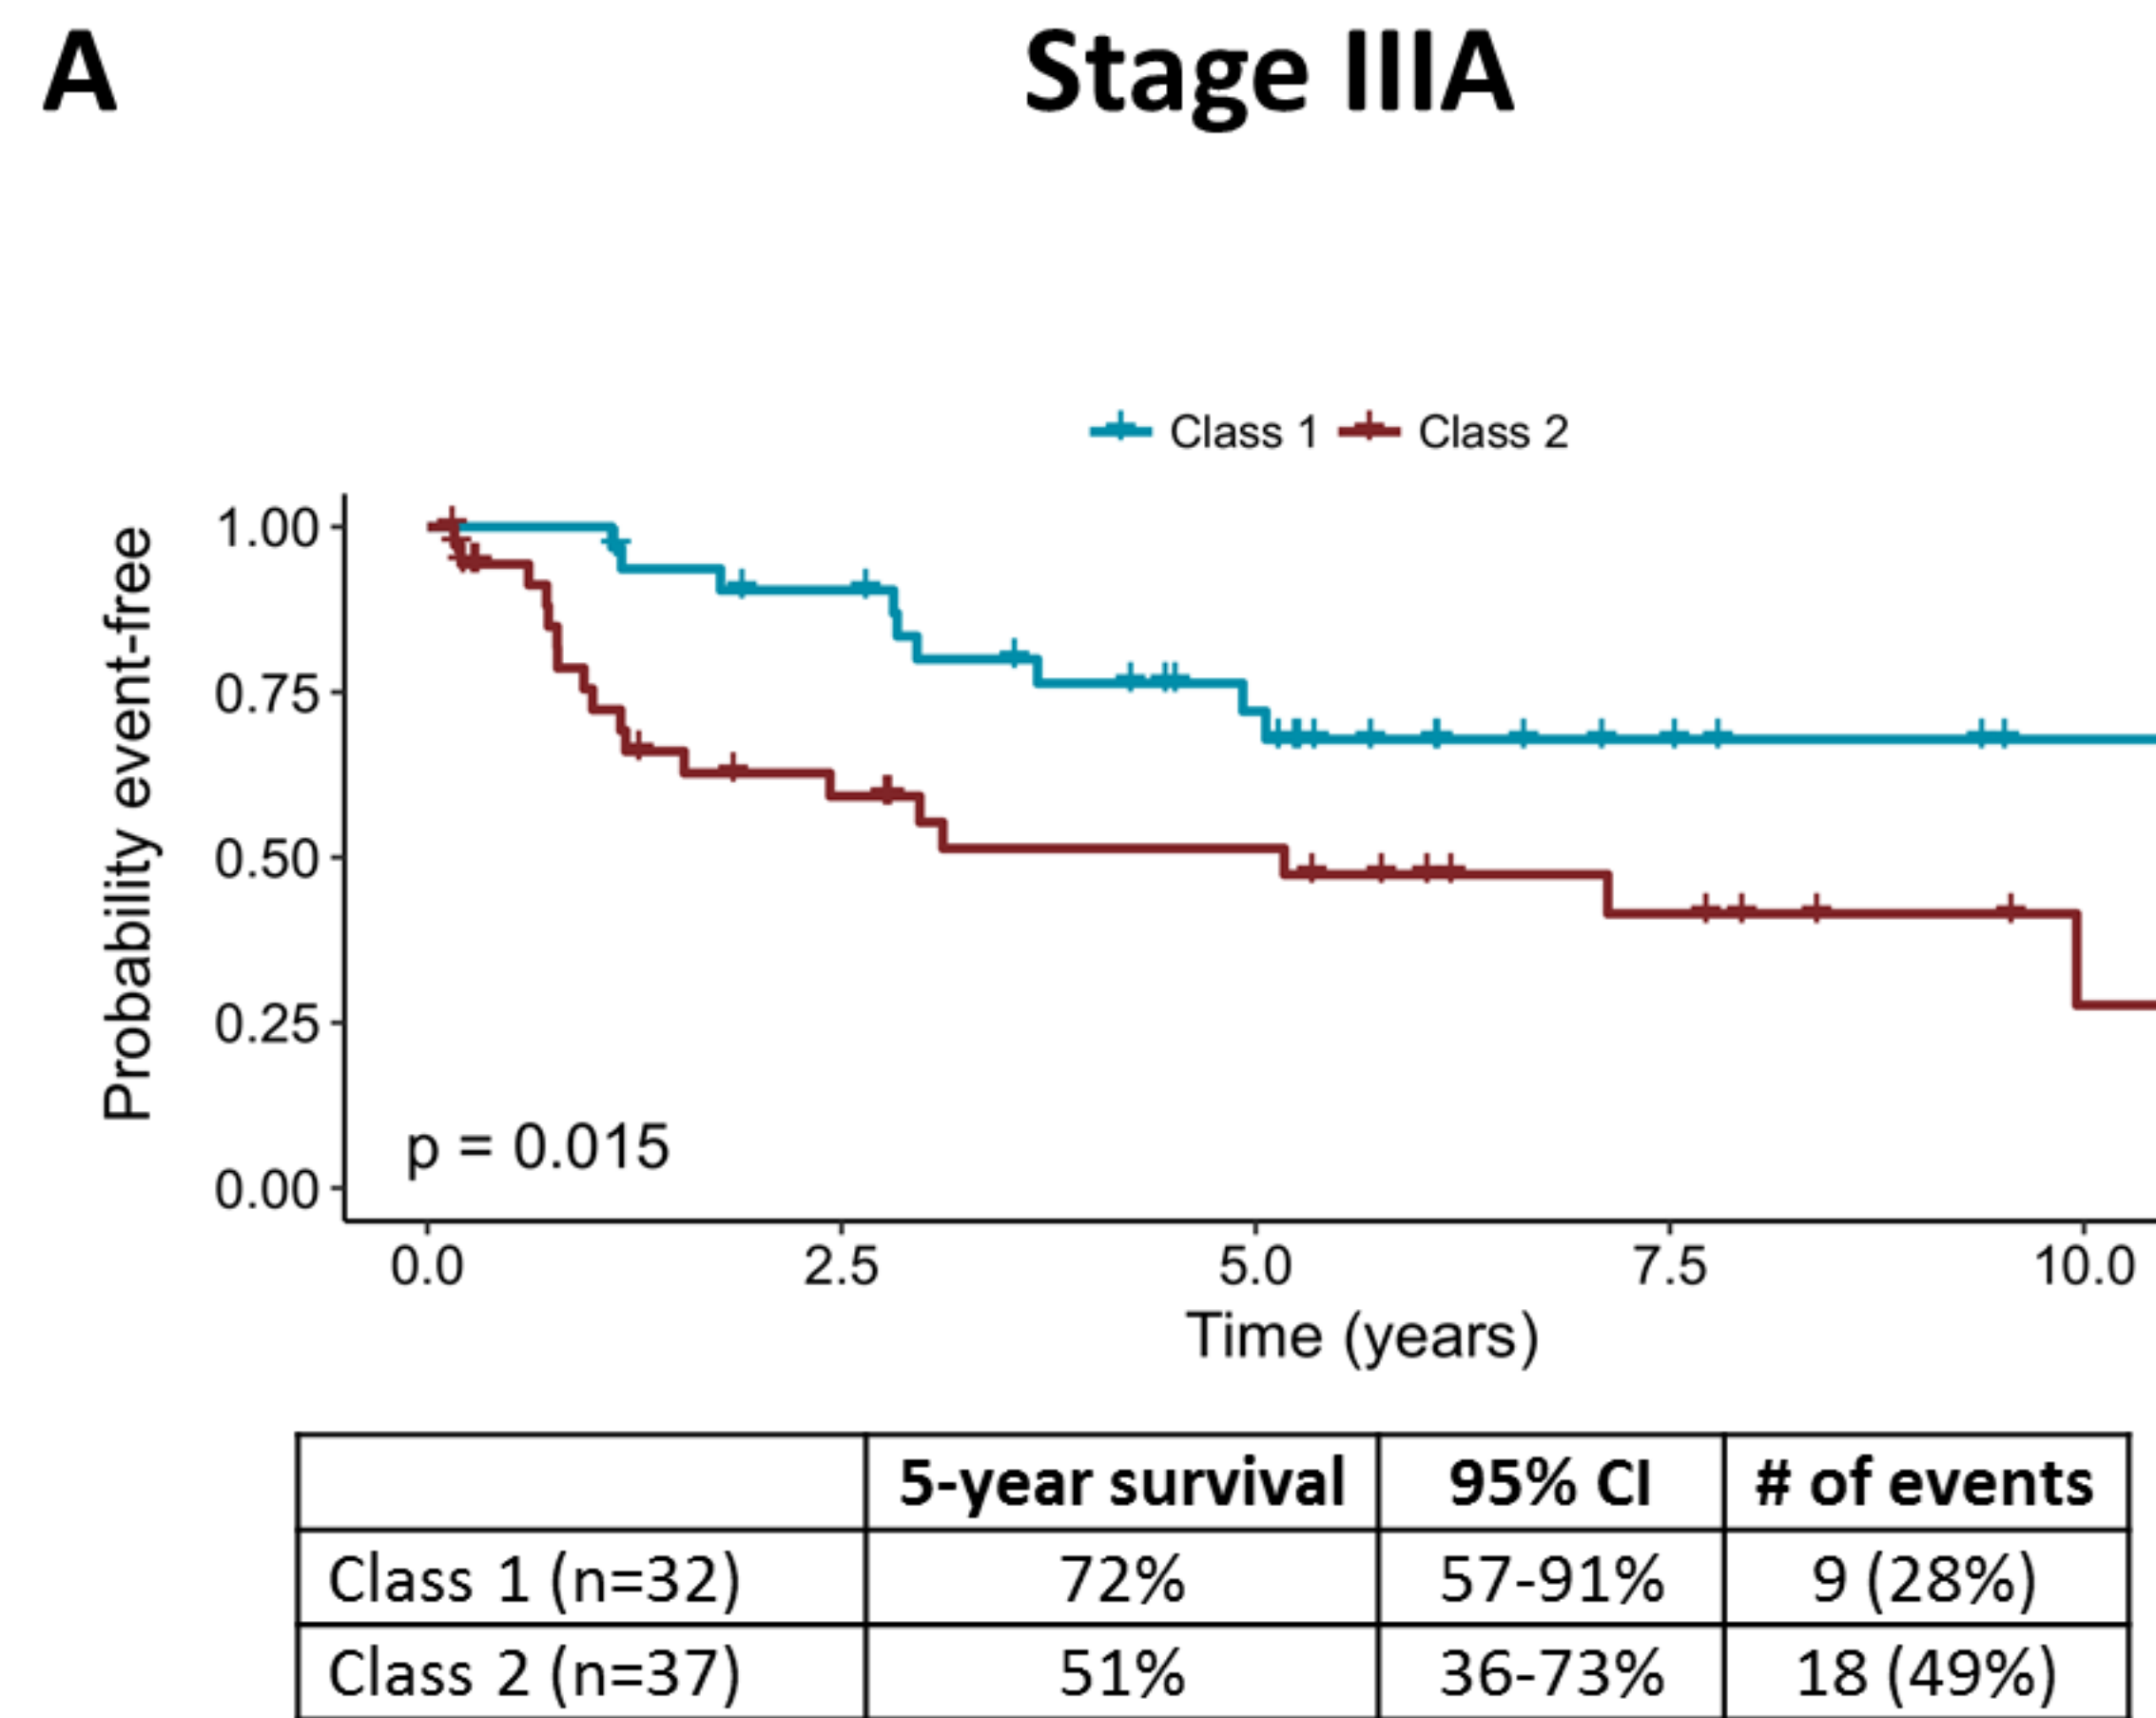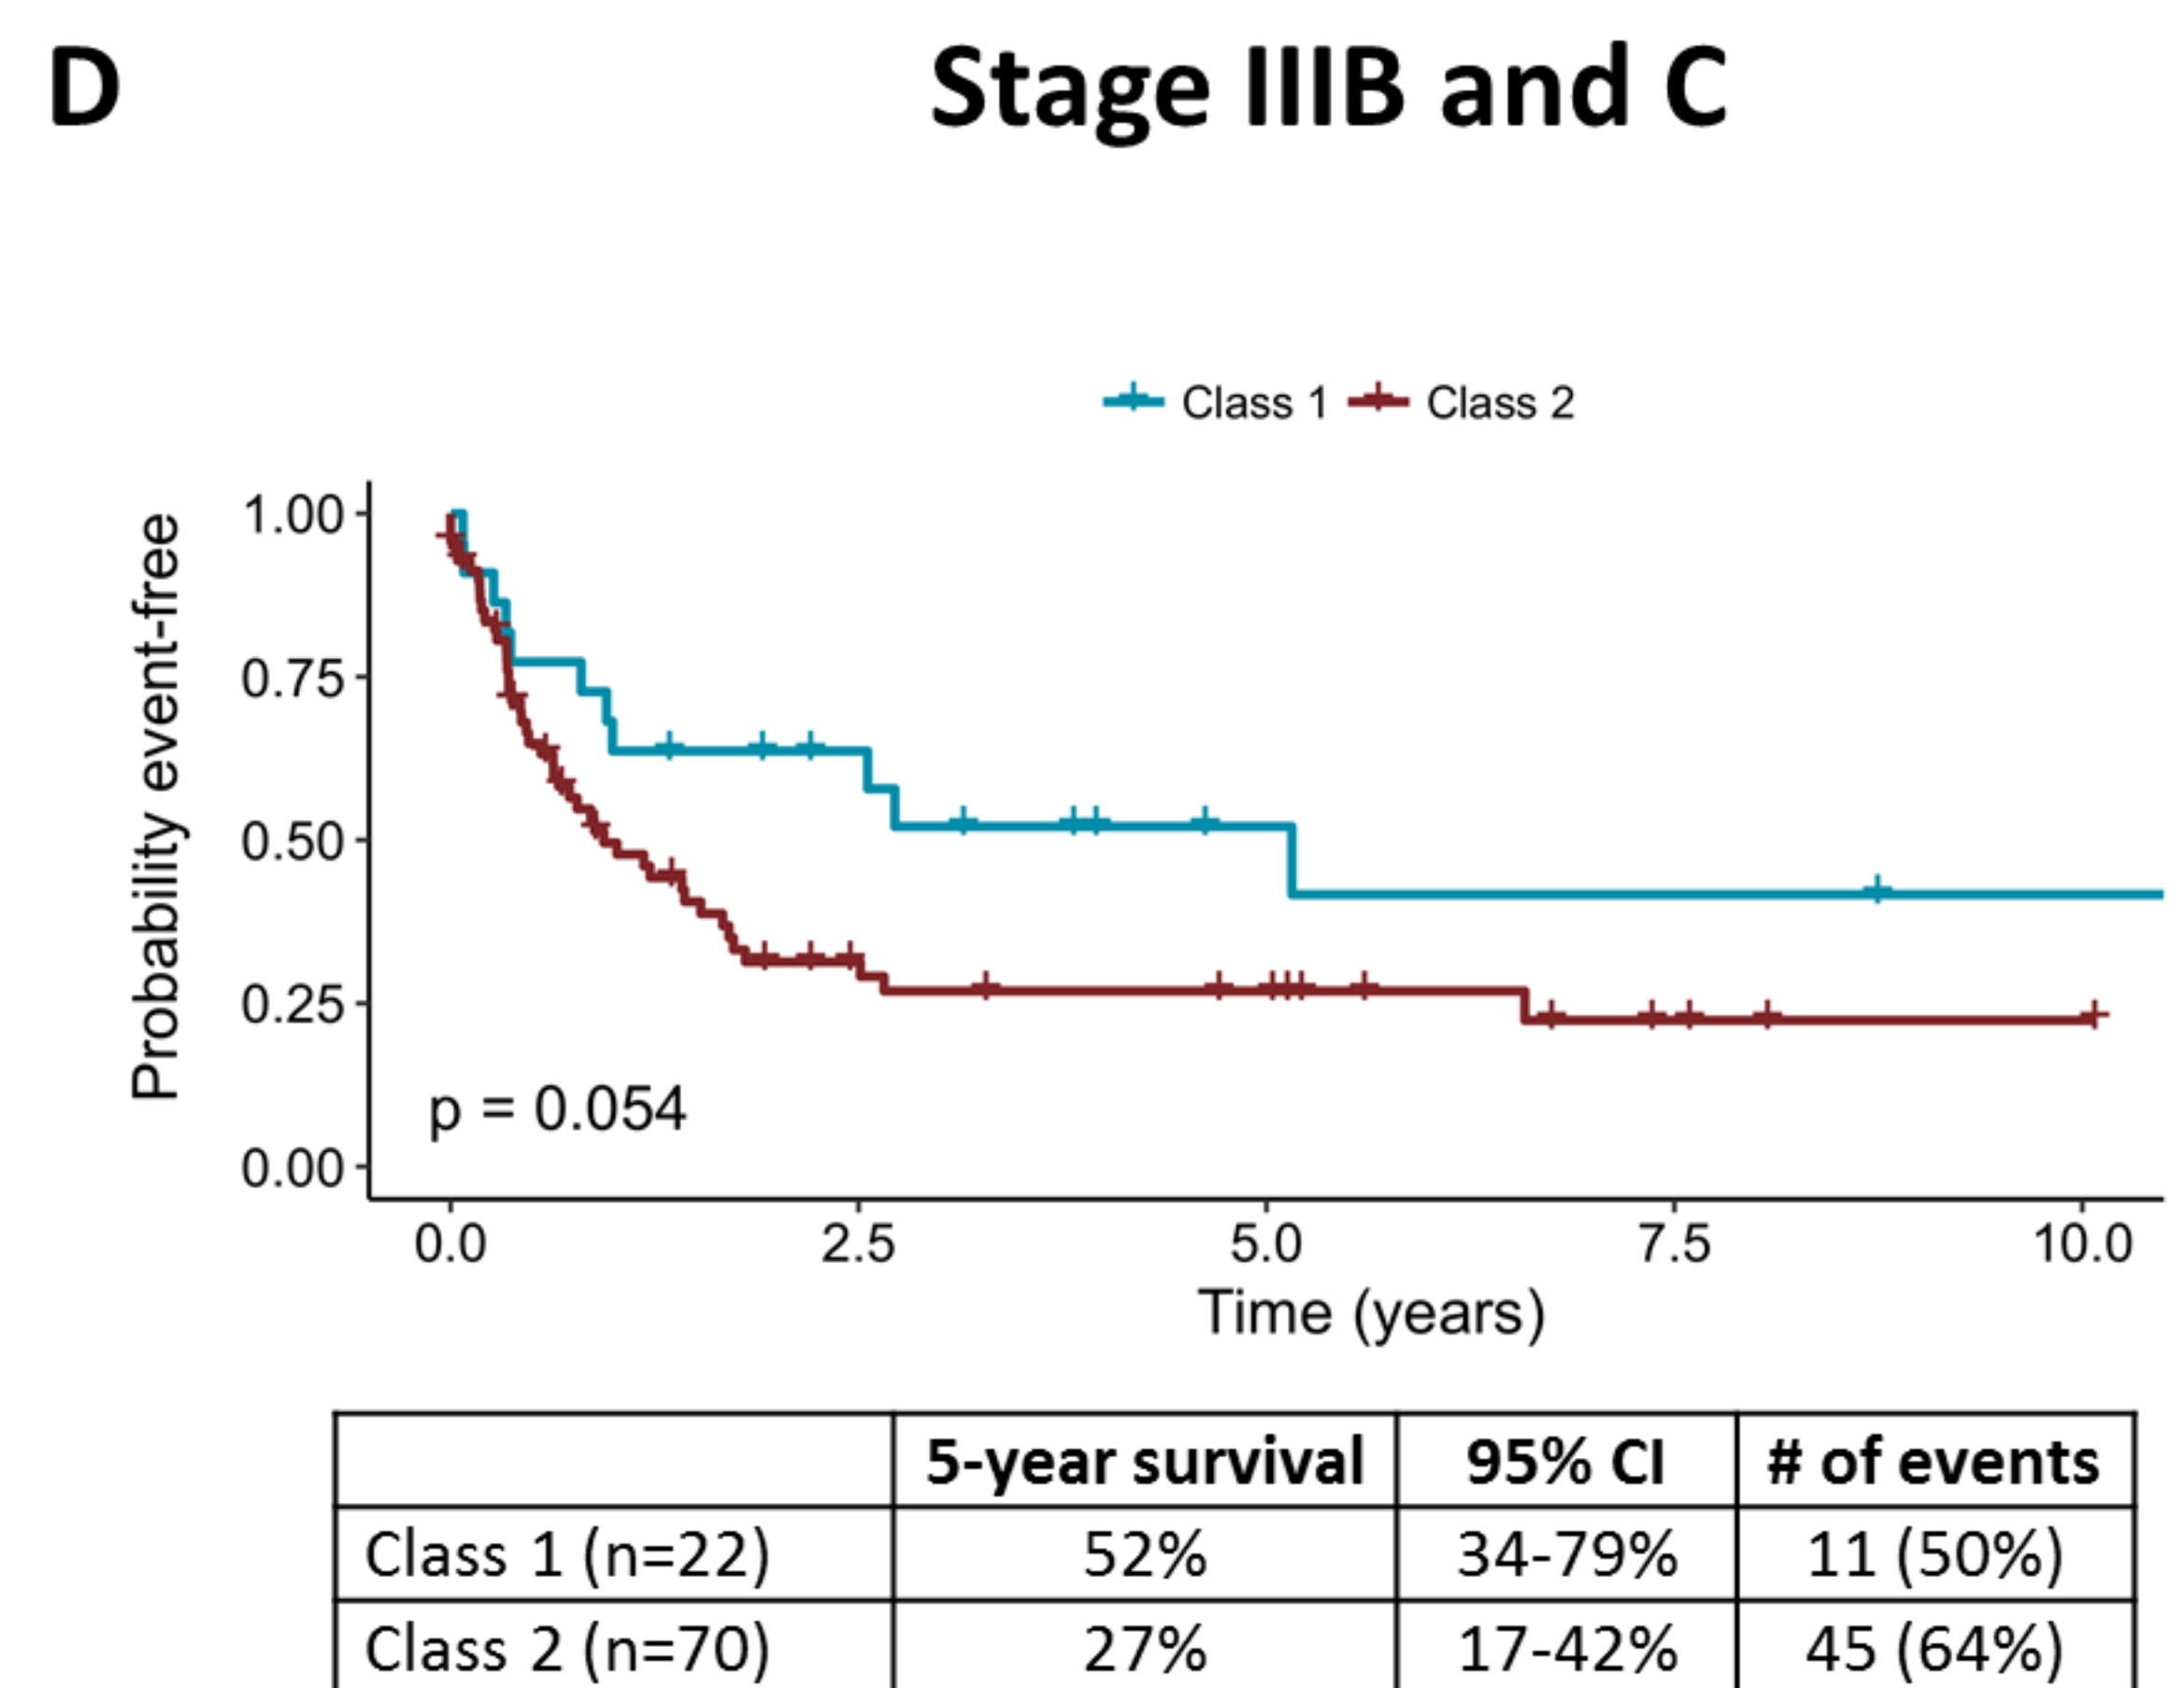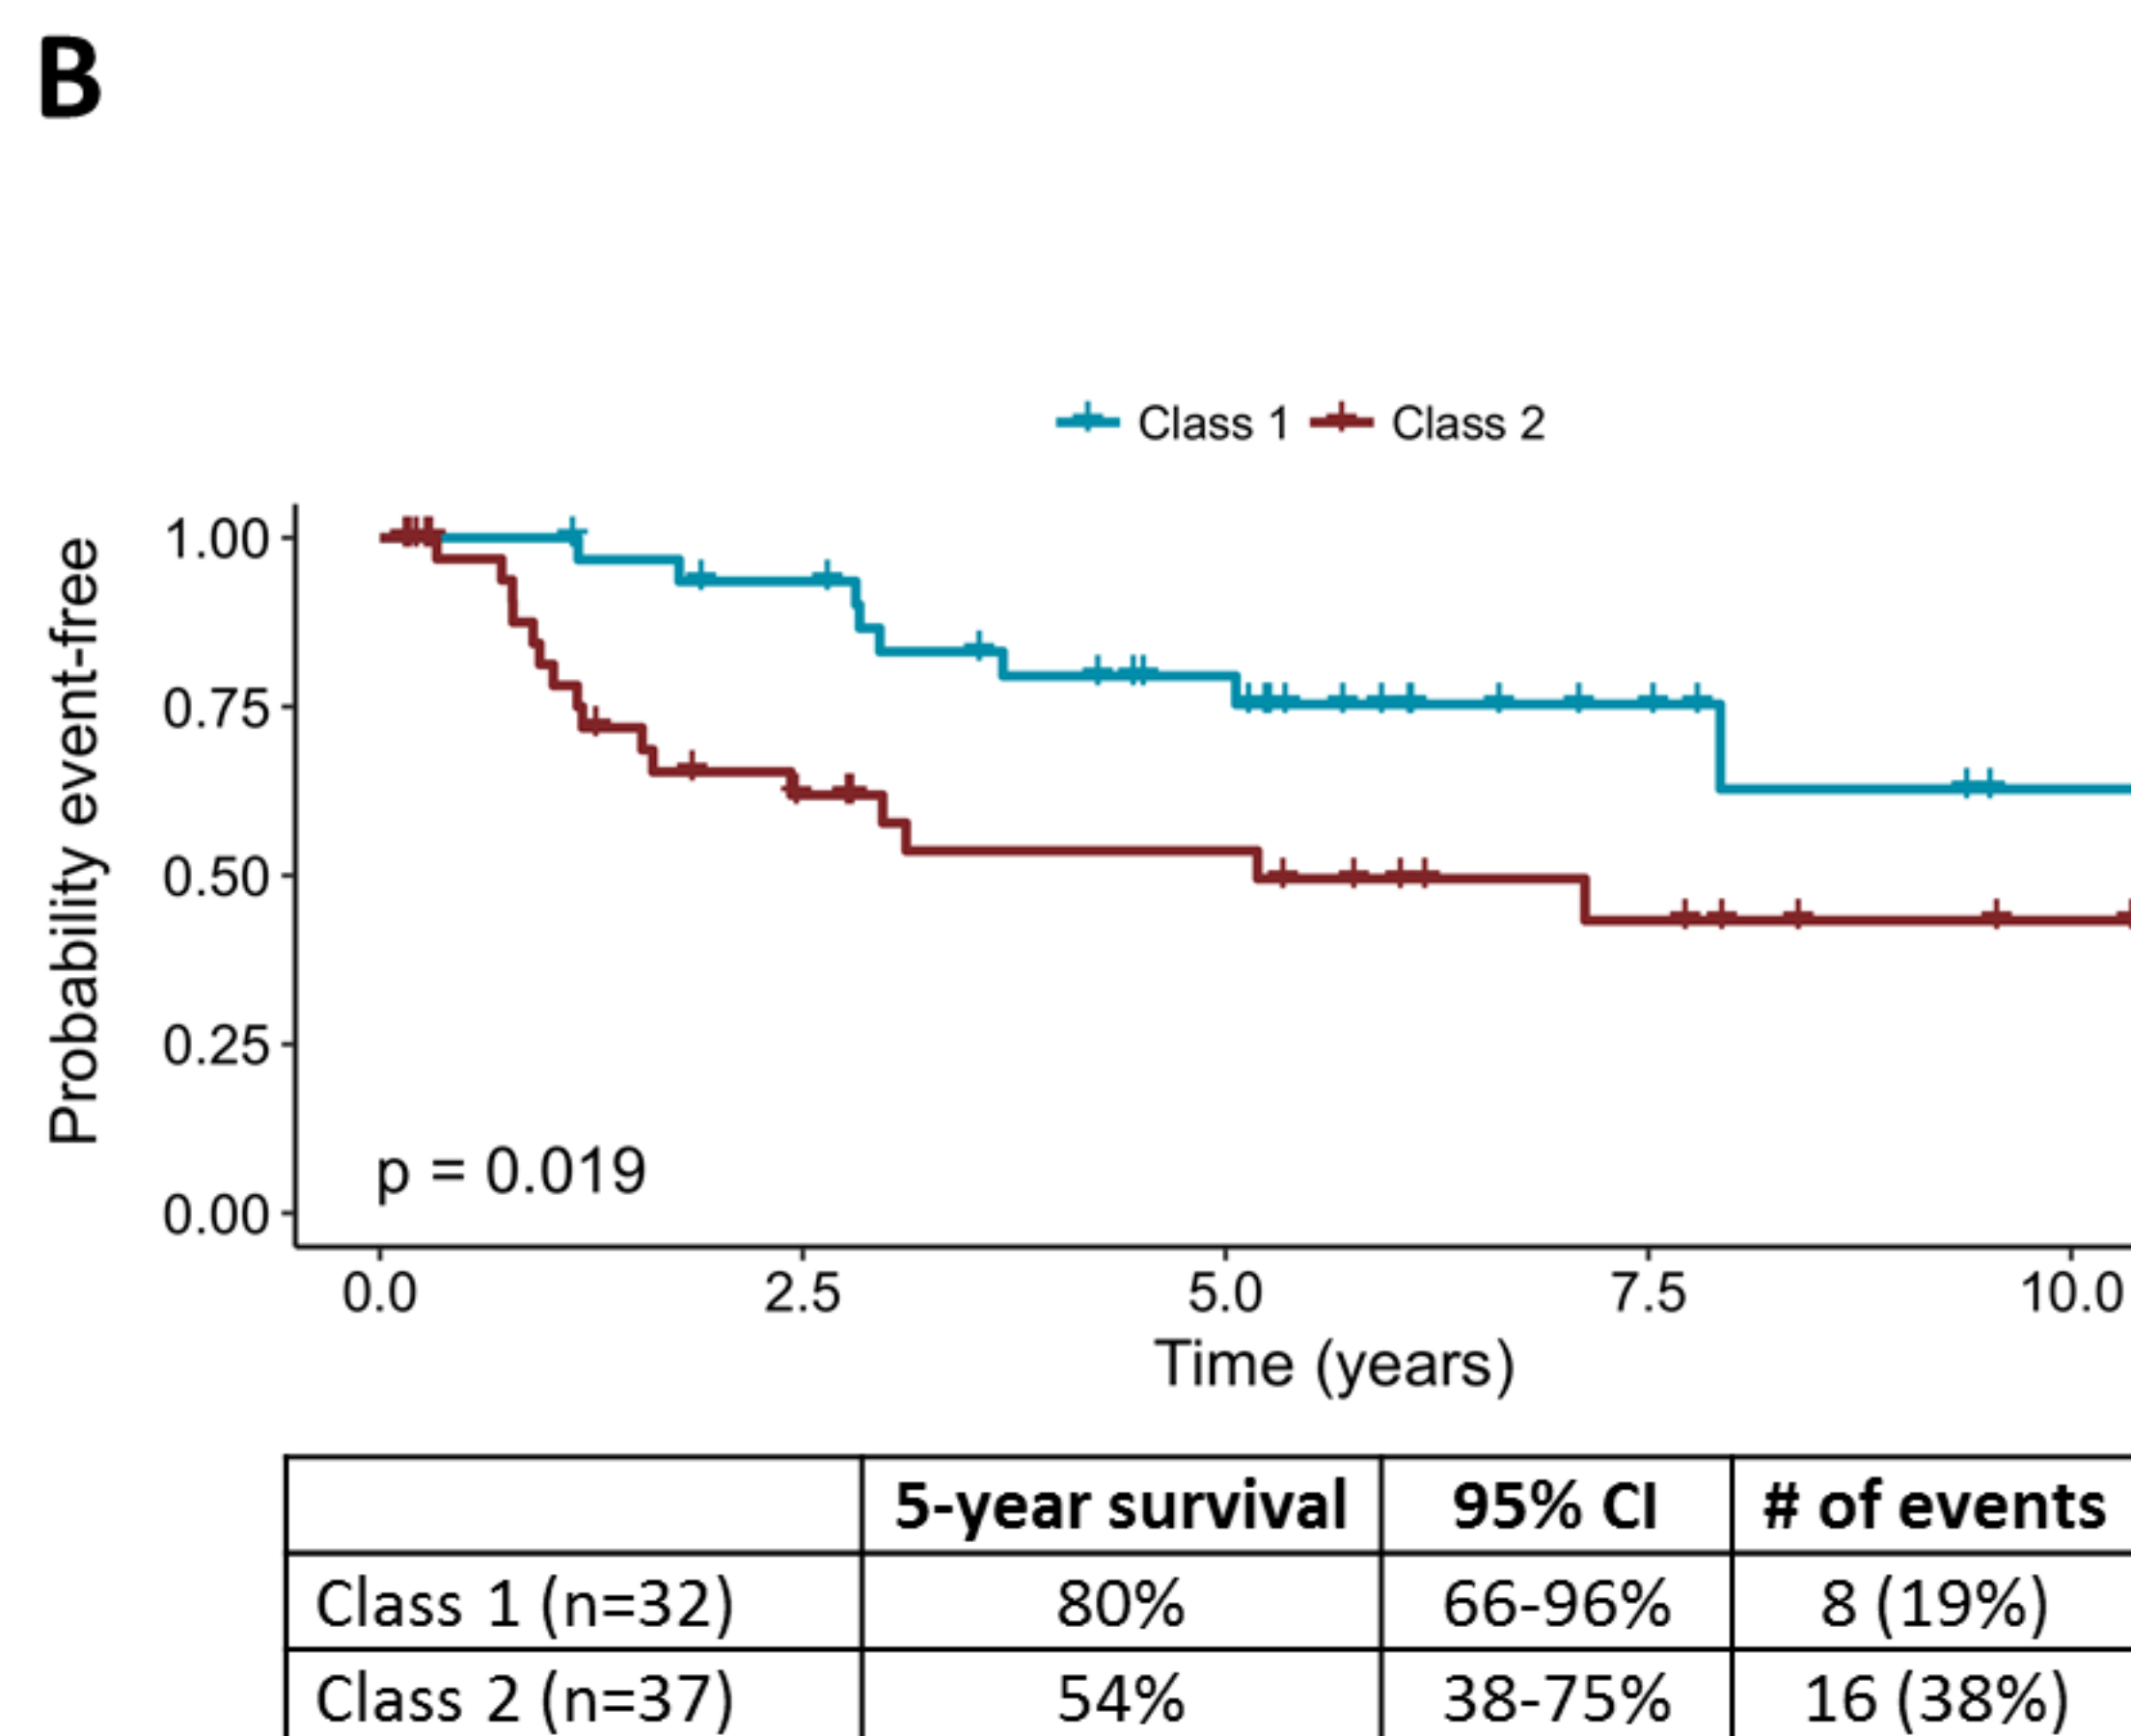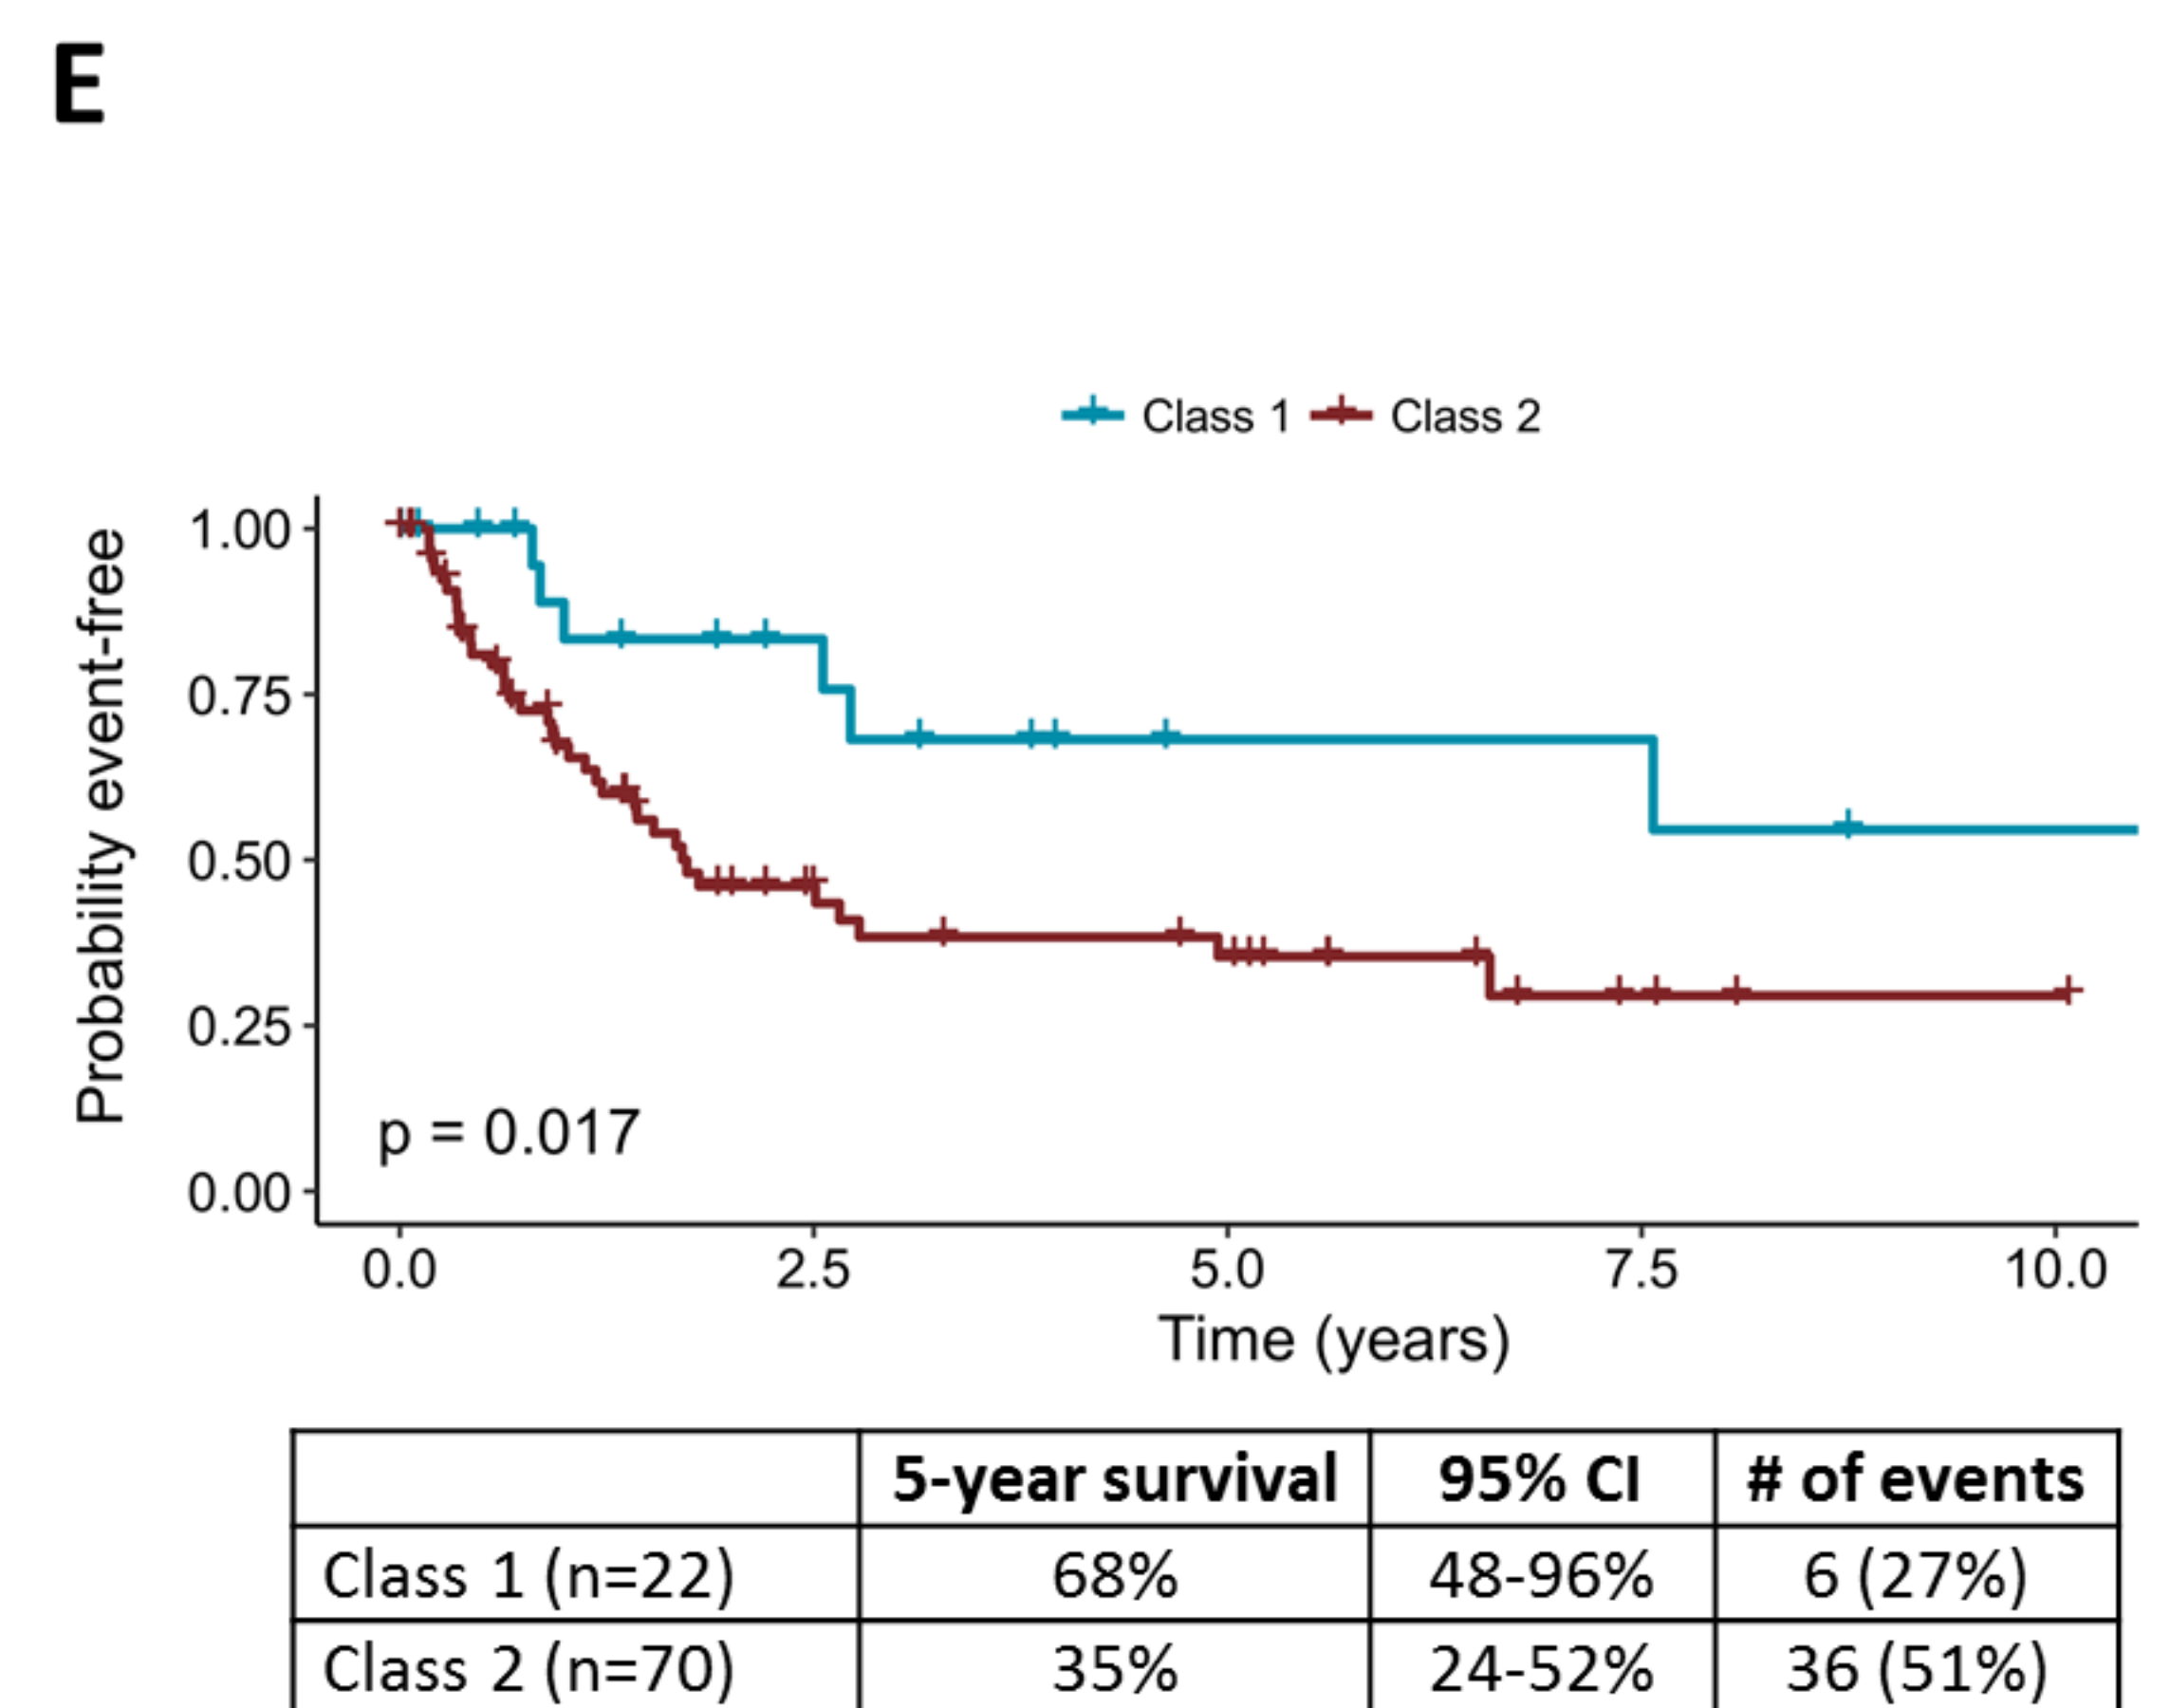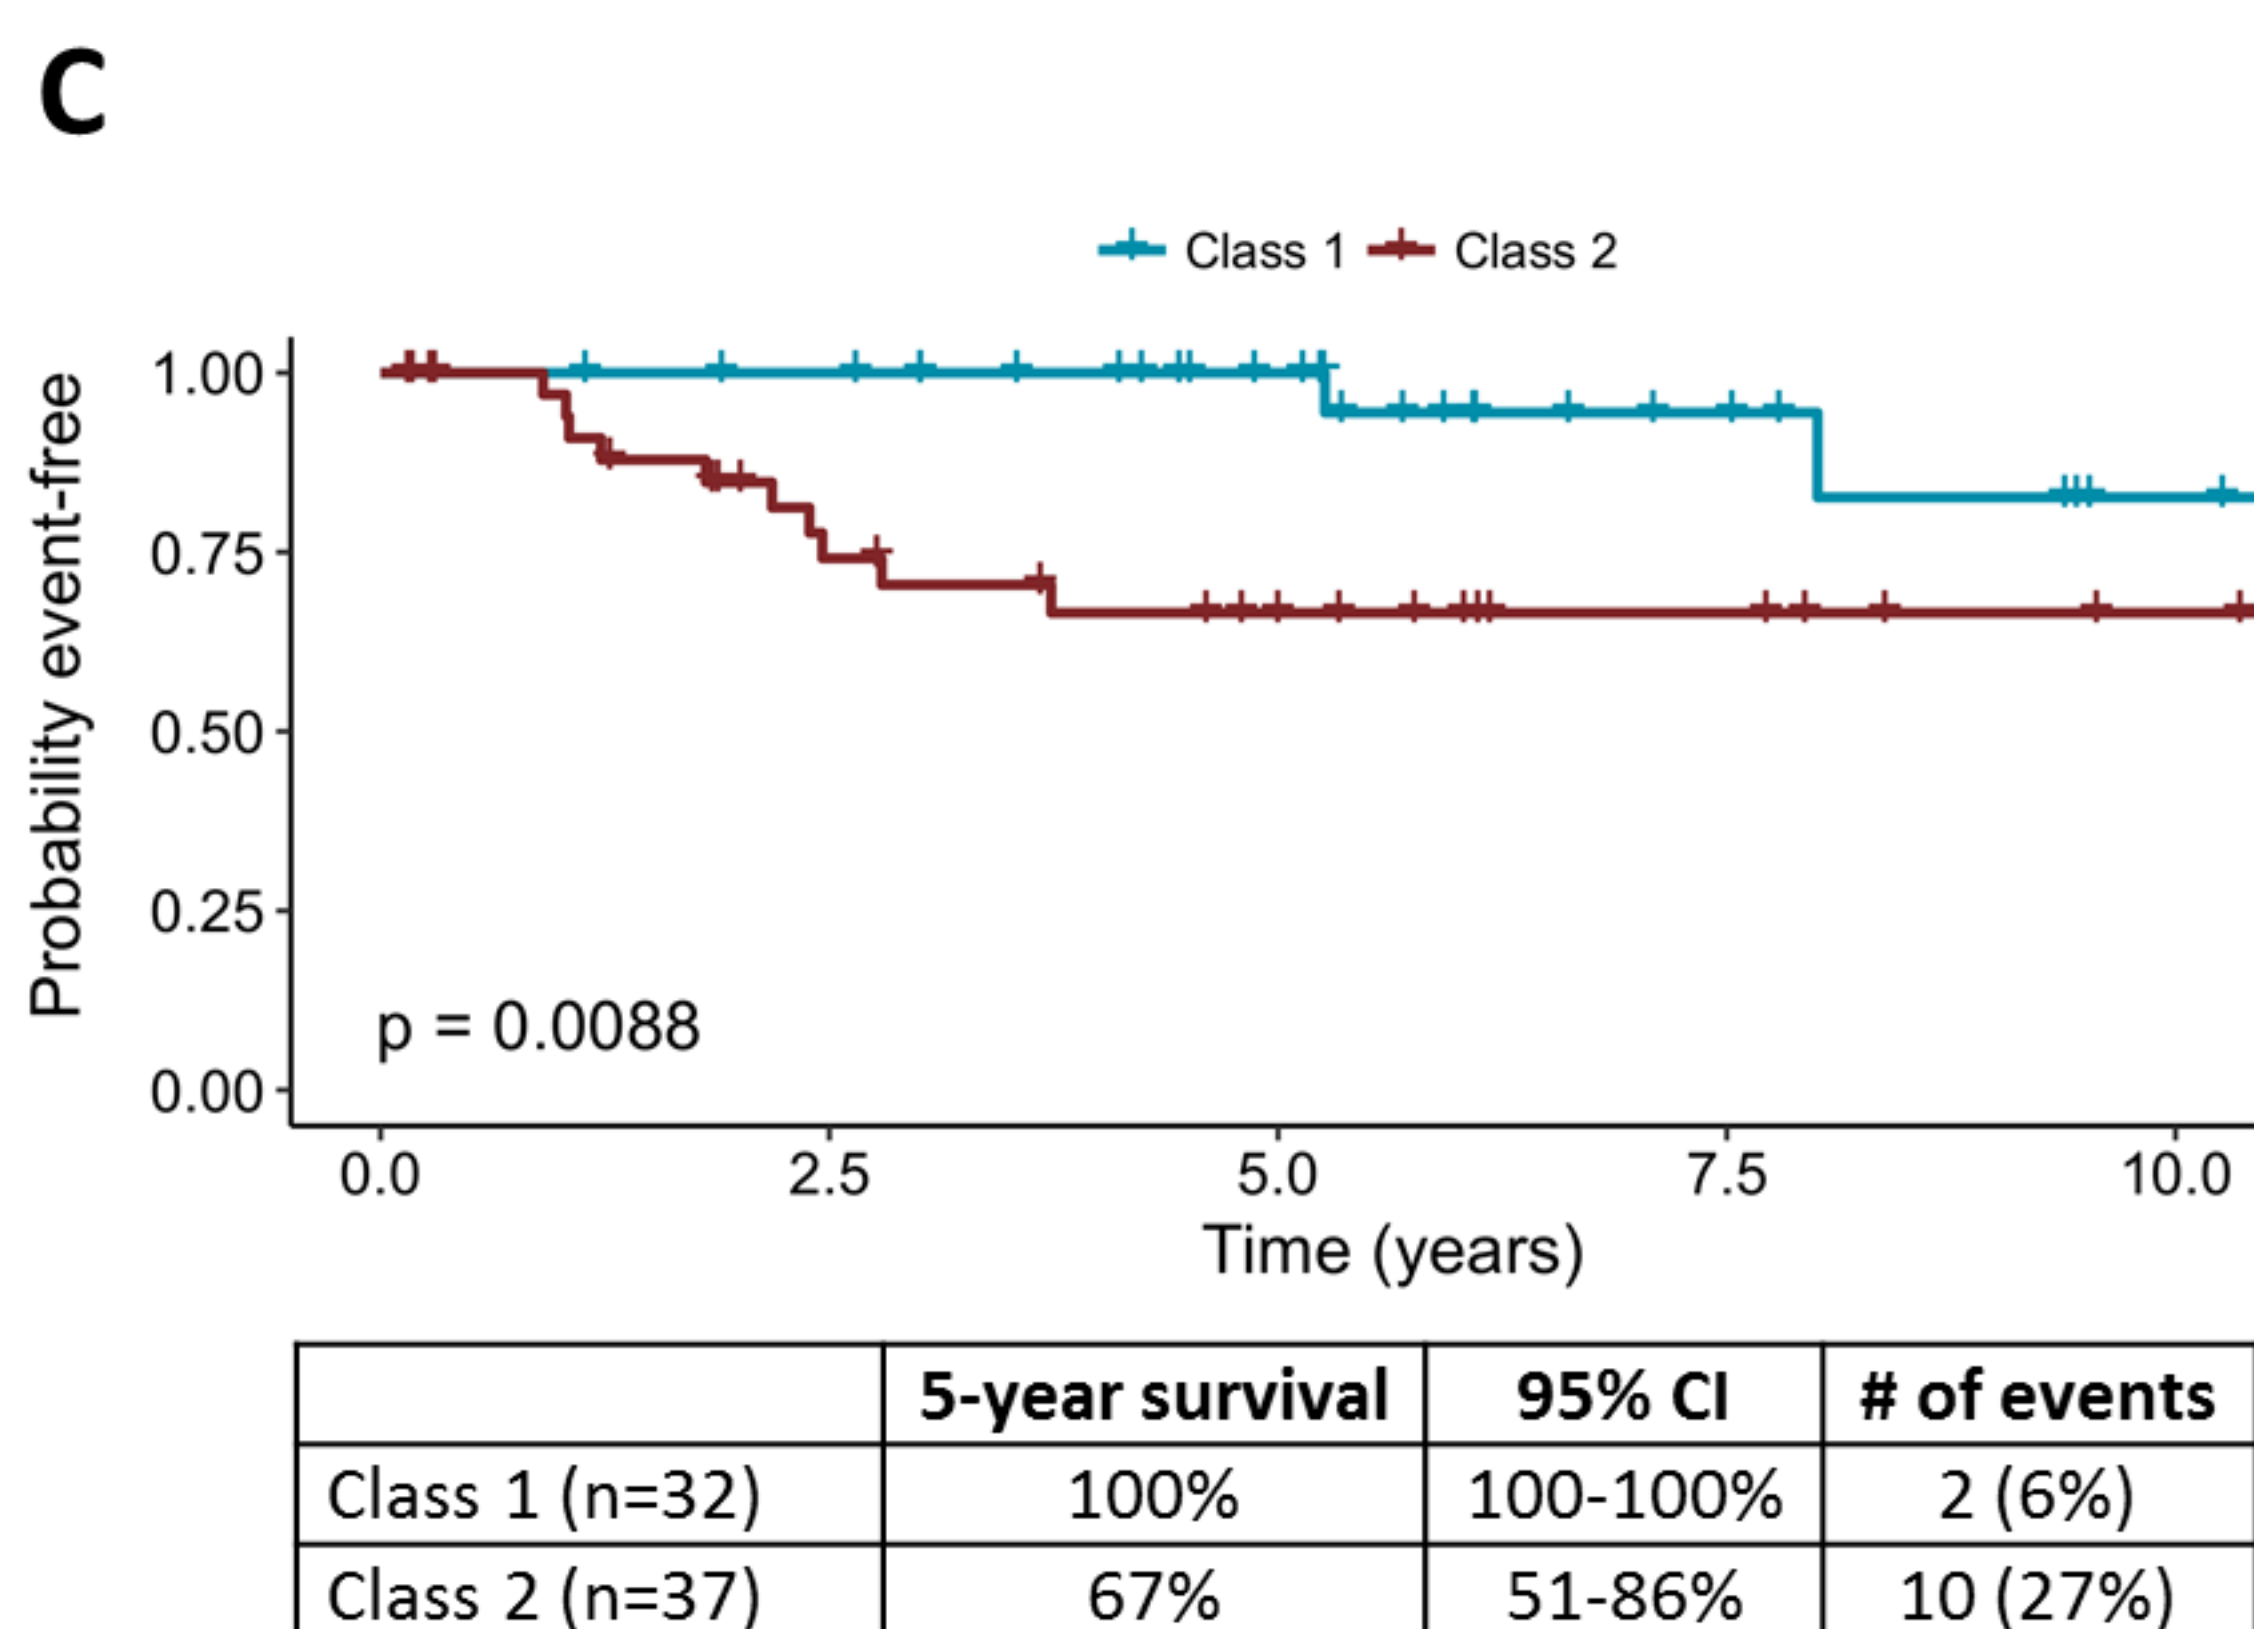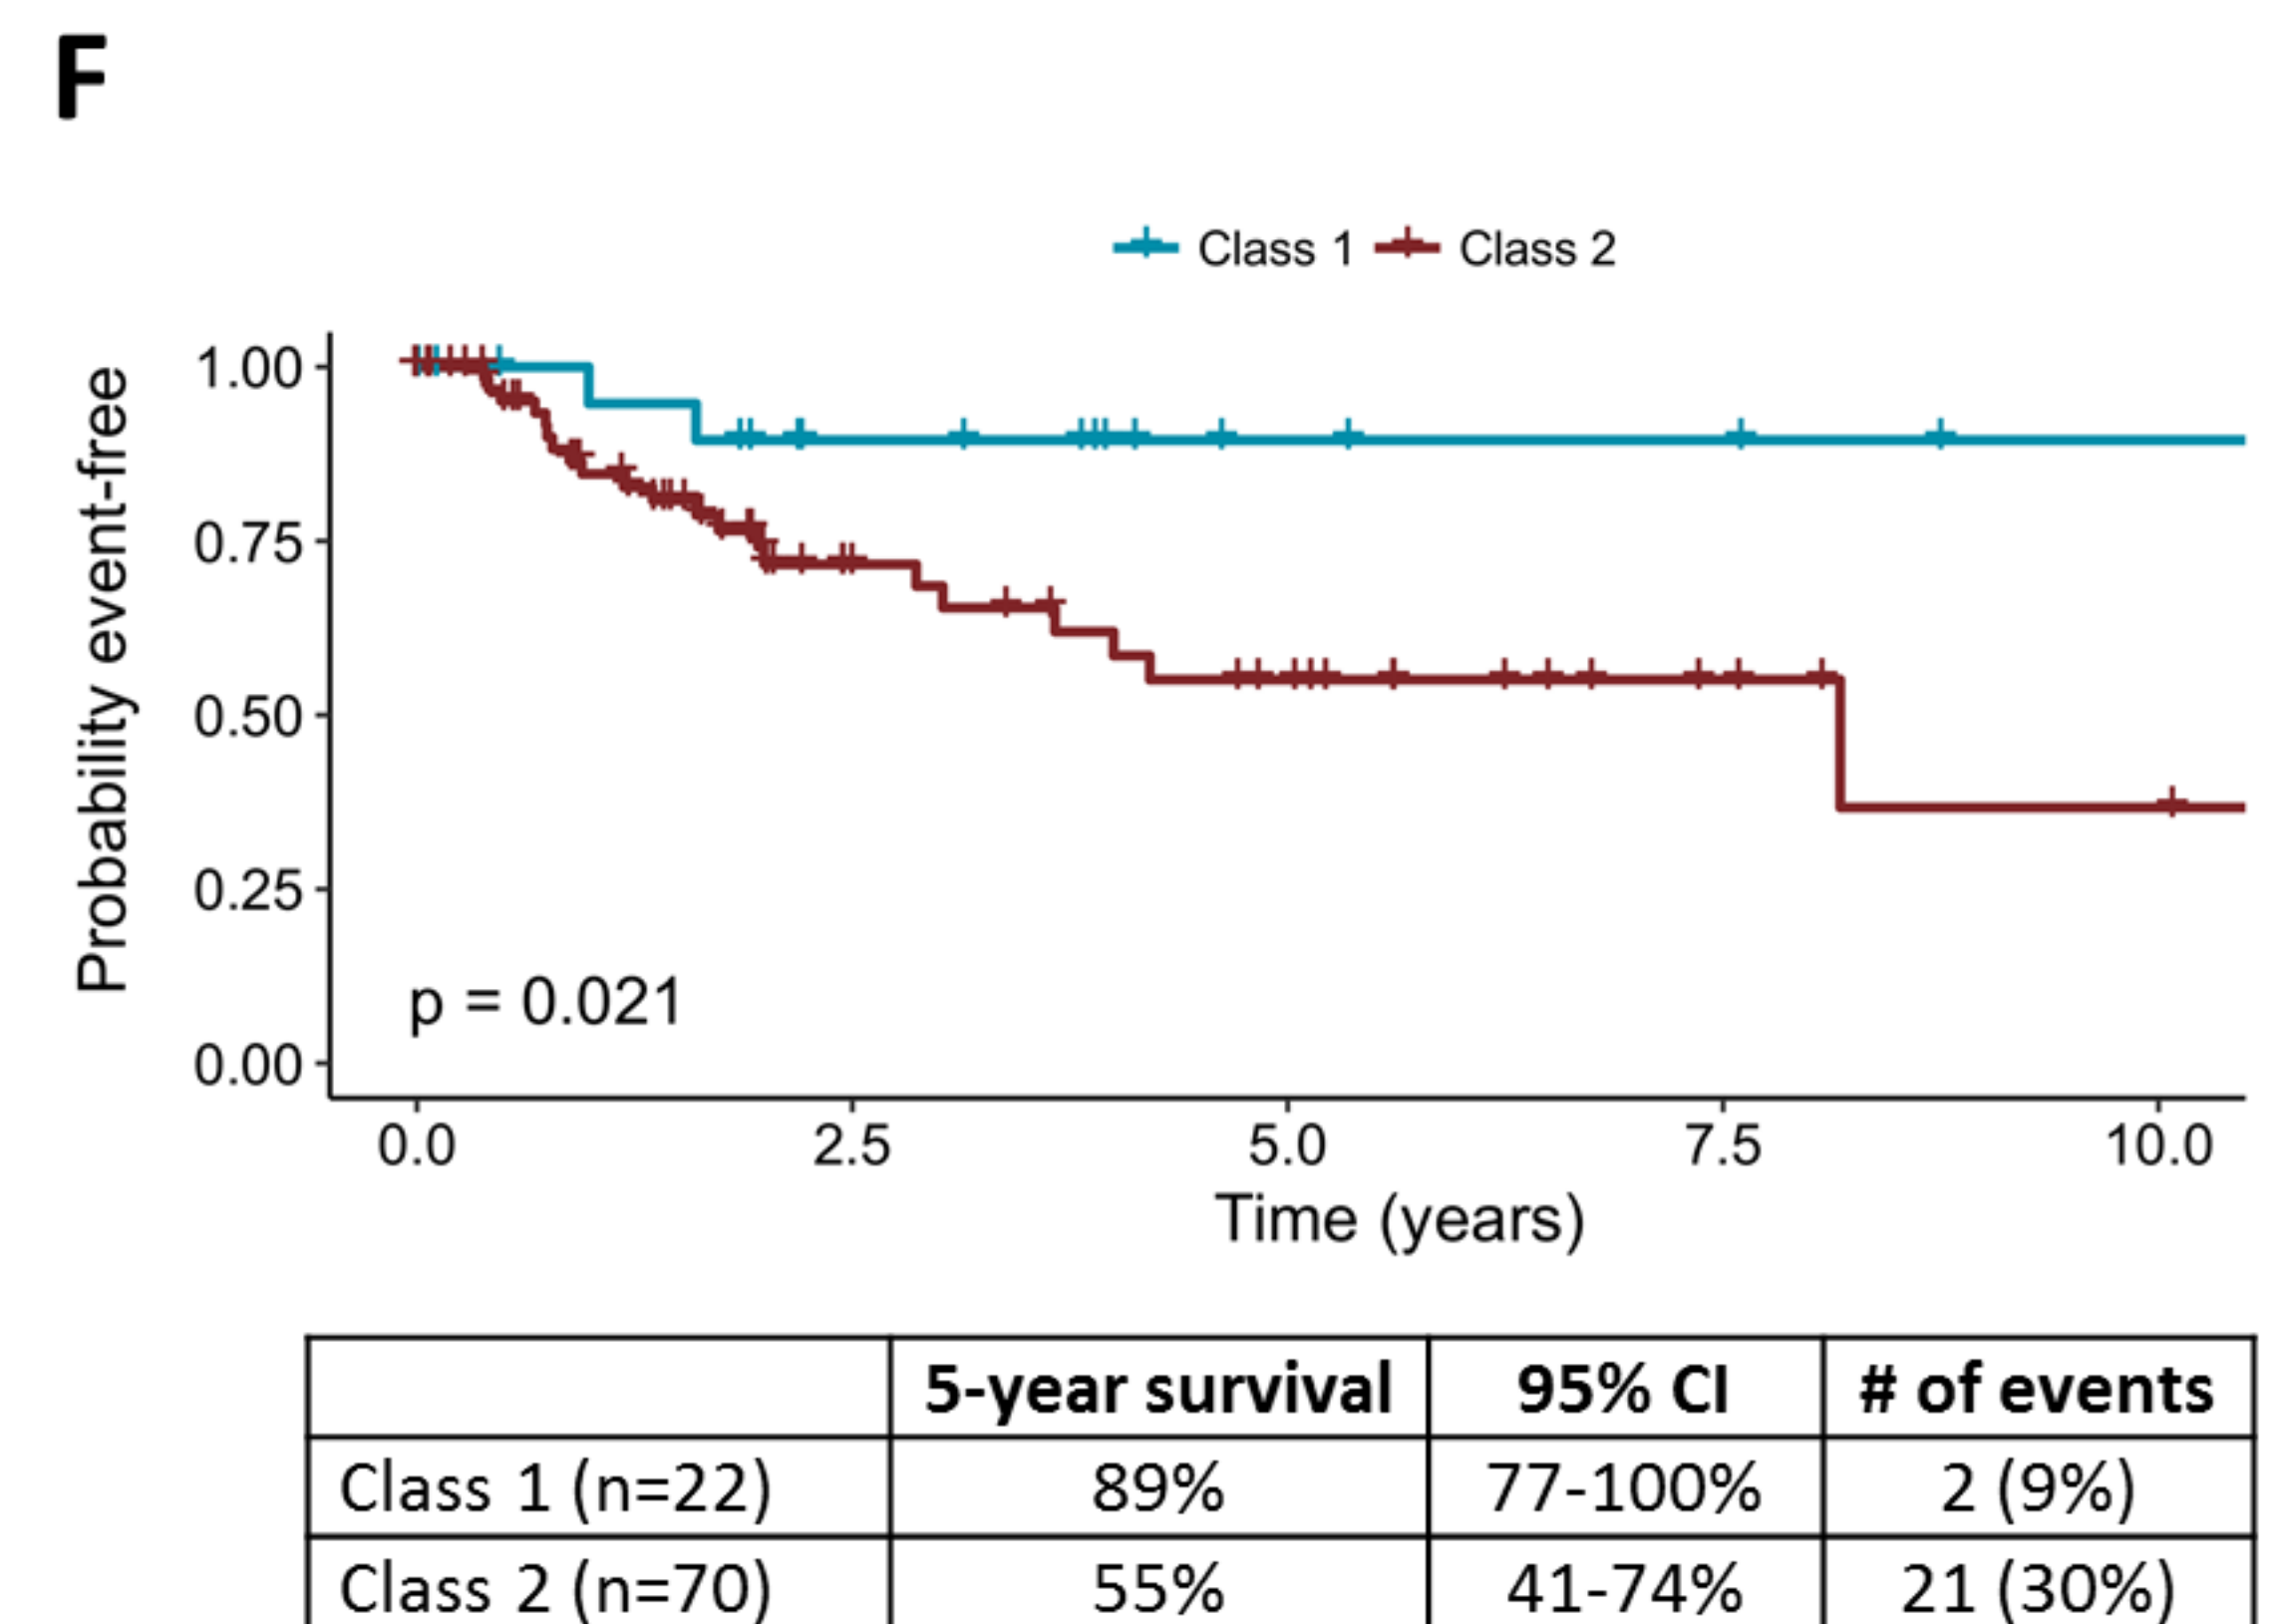

Supplement: 12885_2018_4016_MOESM3_ESM.pdf [file 12885_2018_4016_MOESM3_ESM.pdf]
